# Supplementary material for: Nonclinical and clinical pharmacology evidence for cardiovascular safety of saxagliptin
Source: PubMed Central journal article supplement (PMC5598064; doi:10.1186/s12933-017-0595-6), 2017-09-13
Supplement: 12933_2017_595_MOESM1_ESM.pdf [file 12933_2017_595_MOESM1_ESM.pdf]

**Additional file 1. Saxagliptin and 5-hydroxy saxagliptin pharmacokinetic parameters for multiple ascending dose study in healthy volunteers**

| Pharmacokinetic parameter                              | Saxagliptin dose, mg | Saxagliptin       |                     | 5-Hydroxy saxagliptin |                     |
|--------------------------------------------------------|----------------------|-------------------|---------------------|-----------------------|---------------------|
|                                                        |                      | Day 1*            | Day 14 <sup>†</sup> | Day 1*                | Day 14 <sup>†</sup> |
| C <sub>max</sub> , ng/mL,<br>geometric mean<br>(CV%)   | 40                   | 226 (40)          | 224 (33)            | 331 (33)              | 314 (40)            |
|                                                        | 100                  | 585 (19)          | 487 (14)            | 1125 (33)             | 919 (14)            |
|                                                        | 150                  | 694 (25)          | 614 (19)            | 1550 (10)             | 1268 (15)           |
|                                                        | 200                  | 1207 (11)         | 985 (22)            | 1601 (24)             | 1389 (24)           |
|                                                        | 300                  | 1845 (20)         | 1630 (31)           | 2622 (30)             | 2433 (30)           |
|                                                        | 400                  | 2321 (18)         | 1863 (22)           | 2649 (18)             | 2400 (13)           |
| AUC <sub>T</sub> , ng•h/mL,<br>geometric mean<br>(CV%) | 40                   | 739 (26)          | 800 (24)            | 1739 (25)             | 1708 (30)           |
|                                                        | 100                  | 1899 (18)         | 1998 (11)           | 6092 (15)             | 5741 (14)           |
|                                                        | 150                  | 2543 (11)         | 2532 (9)            | 7992 (13)             | 7474 (12)           |
|                                                        | 200                  | 4186 (15)         | 4090 (10)           | 9479 (18)             | 8850 (22)           |
|                                                        | 300                  | 6652 (22)         | 6439 (26)           | 15483 (33)            | 16027 (32)          |
|                                                        | 400                  | 8364 (14)         | 8532 (13)           | 15357 (18)            | 16921 (12)          |
| T <sub>max</sub> , h, median<br>(minimum,<br>maximum)  | 40                   | 1.0 (0.75, 2.00)  | 0.88 (0.50, 2.00)   | 1.50 (1.50, 3.00)     | 1.50 (1.50, 2.00)   |
|                                                        | 100                  | 1.13 (0.50, 2.00) | 1.50 (0.50, 2.00)   | 1.75 (1.00, 2.00)     | 1.50 (1.50, 3.00)   |
|                                                        | 150                  | 1.50 (0.50, 2.00) | 1.25 (0.75, 2.00)   | 2.00 (1.50, 3.00)     | 2.00 (1.50, 3.00)   |
|                                                        | 200                  | 1.50 (0.50, 2.00) | 1.50 (0.75, 2.00)   | 2.00 (1.50, 3.00)     | 2.00 (1.00, 3.00)   |
|                                                        | 300                  | 1.50 (1.00, 1.50) | 1.75 (1.00, 2.00)   | 2.00 (1.50, 3.00)     | 2.50 (1.50, 3.00)   |
|                                                        | 400                  | 1.50 (1.00, 1.50) | 1.50 (0.75, 2.00)   | 2.00 (2.00, 2.00)     | 2.50 (2.00, 3.00)   |

|                           |     |             |             |             |             |
|---------------------------|-----|-------------|-------------|-------------|-------------|
| $T_{1/2}$ , h, mean, (SD) | 40  | 2.29 (0.18) | 2.46 (0.29) | 2.96 (0.29) | 3.71 (1.05) |
|                           | 100 | 2.32 (0.22) | 3.03 (1.29) | 4.44 (0.31) | 5.86 (1.85) |
|                           | 150 | 2.27 (0.14) | 2.69 (0.91) | 4.19 (0.54) | 5.84 (1.96) |
|                           | 200 | 2.25 (0.21) | 3.58 (1.25) | 4.08 (0.14) | 5.98 (1.85) |
|                           | 300 | 2.88 (0.85) | 5.38 (3.44) | 4.27 (0.32) | 7.24 (2.03) |
|                           | 400 | 3.79 (1.11) | 5.48 (2.55) | 4.41 (0.55) | 7.38 (1.71) |

$AUC_t$  area under the concentration–time curve in one dosing interval,  $C_{max}$  maximum observed plasma concentration,  $CV\%$  coefficient of variation,  $SD$  standard deviation,  $t_{1/2}$  half-life,  $T_{max}$  time to maximum plasma concentration. \*n = 10 for saxagliptin 10 mg, n = 6 for all other doses; †n = 10 for saxagliptin 10 mg, n = 6 for all other doses except saxagliptin 200 mg (n = 5).
