# Supplementary material for: Nonclinical and clinical pharmacology evidence for cardiovascular safety of saxagliptin
Source: PubMed Central journal article supplement (PMC5598064; doi:10.1186/s12933-017-0595-6), 2017-09-13
Supplement: 12933_2017_595_MOESM2_ESM.pdf [file 12933_2017_595_MOESM2_ESM.pdf]

**Additional file 2. Saxagliptin and 5-hydroxy saxagliptin pharmacokinetic parameters following once daily dosing for 4 days (tQTc study)**

| <b>Pharmacokinetic parameter</b>                 | <b>Saxagliptin dose, mg</b> | <b>Saxagliptin (n = 36)</b> | <b>5-Hydroxy saxagliptin (n = 36)</b> |
|--------------------------------------------------|-----------------------------|-----------------------------|---------------------------------------|
| $C_{max}$ , ng/mL, geometric mean (CV%)          | 10                          | 49 (35)                     | 118 (24)                              |
|                                                  | 40                          | 235 (34)                    | 497 (23)                              |
| AUC <sub>T</sub> , ng*h/mL, geometric mean (CV%) | 10                          | 171 (30)                    | 634 (20)                              |
|                                                  | 40                          | 745 (30)                    | 2623 (19)                             |
| $T_{max}$ , h, median (minimum, maximum)         | 10                          | 0.75 (0.50, 3.00)           | 1.50 (1.00, 3.00)                     |
|                                                  | 40                          | 0.50 (0.25, 1.50)           | 1.50 (1.00, 2.00)                     |
| $C_{avg[0-24]}$ , ng/mL, geometric mean (CV%)    | 10                          | 7 (30)                      | 26 (20)                               |
|                                                  | 40                          | 31 (30)                     | 109 (19)                              |

AUC<sub>T</sub> area under the concentration–time curve in one dosing interval,  $C_{avg[0-24]}$  average plasma concentration of saxagliptin or 5-hydroxy saxagliptin over a 24-hour dosing interval,  $C_{max}$  maximum observed plasma concentration, CV% coefficient of variation,  $T_{max}$  time to maximum plasma concentration.
