# Supplementary material for: Nonclinical and clinical pharmacology evidence for cardiovascular safety of saxagliptin
Source: PubMed Central journal article supplement (PMC5598064; doi:10.1186/s12933-017-0595-6), 2017-09-13
Supplement: 12933_2017_595_MOESM3_ESM.pdf [file 12933_2017_595_MOESM3_ESM.pdf]

**Additional file 3. Saxagliptin and 5-hydroxy saxagliptin pharmacokinetic parameters for multiple ascending dose study in patients with T2DM**

| Pharmacokinetic parameter                              | Saxagliptin dose, mg | Saxagliptin       |                     | 5-Hydroxy saxagliptin |                     |
|--------------------------------------------------------|----------------------|-------------------|---------------------|-----------------------|---------------------|
|                                                        |                      | Day 1*            | Day 14 <sup>†</sup> | Day 1*                | Day 14 <sup>†</sup> |
| C <sub>max</sub> , ng/mL,<br>geometric mean<br>(CV%)   | 2.5                  | 11 (34)           | 12 (23)             | 35 (28)               | 43 (39)             |
|                                                        | 5                    | 21 (18)           | 23 (22)             | 77 (33)               | 78 (31)             |
|                                                        | 15                   | 94 (26)           | 89 (20)             | 249 (39)              | 243 (17)            |
|                                                        | 30                   | 122 (33)          | 141 (25)            | 382 (32)              | 418 (29)            |
|                                                        | 50                   | 206 (11)          | 218 (13)            | 1013 (36)             | 846 (29)            |
| AUC <sub>T</sub> , ng•h/mL,<br>geometric mean<br>(CV%) | 2.5                  | 33 (28)           | 34 (20)             | 203 (41)              | 251 (48)            |
|                                                        | 5                    | 77 (25)           | 81 (20)             | 393 (44)              | 438 (36)            |
|                                                        | 15                   | 371 (19)          | 365 (25)            | 1421 (43)             | 1395 (25)           |
|                                                        | 30                   | 618 (40)          | 676 (38)            | 2499 (48)             | 2761 (51)           |
|                                                        | 50                   | 949 (17)          | 915 (19)            | 6507 (43)             | 5632 (15)           |
| T <sub>max</sub> , h, median<br>(minimum,<br>maximum)  | 2.5                  | 1.50 (0.75, 2.00) | 1.50 (0.75, 2.00)   | 3.00 (2.00, 4.00)     | 3.00 (2.00, 4.00)   |
|                                                        | 5                    | 2.00 (1.00, 3.00) | 2.00 (1.50, 4.00)   | 3.00 (3.00, 3.00)     | 3.00 (2.00, 4.00)   |
|                                                        | 15                   | 2.00 (0.75, 3.00) | 1.75 (1.00, 2.00)   | 3.00 (2.00, 4.00)     | 2.50 (2.00, 3.00)   |
|                                                        | 30                   | 3.00 (2.00, 4.00) | 2.00 (1.00, 3.00)   | 3.50 (3.00, 4.00)     | 3.00 (2.00, 4.00)   |
|                                                        | 50                   | 2.50 (1.00, 3.00) | 1.50 (1.50, 3.00)   | 3.00 (2.00, 4.00)     | 3.50 (2.00, 4.00)   |
| T <sub>½</sub> , h, mean, (SD)                         | 2.5                  | 3.84 (1.72)       | 3.32 (1.11)         | 4.36 (1.17)           | 4.58 (1.07)         |
|                                                        | 5                    | 2.21 (0.15)       | 2.33 (0.24)         | 3.60 (0.48)           | 3.67 (0.65)         |
|                                                        | 15                   | 2.46 (0.50)       | 2.55 (0.35)         | 3.41 (0.77)           | 3.91 (1.90)         |
|                                                        | 30                   | 2.35 (0.40)       | 2.36 (0.35)         | 3.53 (1.03)           | 3.81 (1.21)         |

|  |    |             |             |             |             |
|--|----|-------------|-------------|-------------|-------------|
|  | 50 | 2.17 (0.27) | 2.39 (0.34) | 4.15 (0.97) | 4.81 (0.40) |
|--|----|-------------|-------------|-------------|-------------|

*AUC*<sub>τ</sub> area under the concentration–time curve in one dosing interval, *C*<sub>max</sub> maximum observed plasma concentration, *CV*% coefficient of variation, *SD* standard deviation, *t*<sub>½</sub> half-life, *T*<sub>max</sub> time to maximum plasma concentration. \*n = 5 for saxagliptin 5 mg, n = 6 for all other doses; †n = 4 for saxagliptin 50 mg, n = 6 for all other doses.
